# Supplementary material for: Global burden of esophageal cancer attributable to diet low in vegetables: an analysis of the Global Burden of Disease Study 2021
Source: Research Square preprint supplement (doi:10.21203/rs.3.rs-7800644/v1), 2025-12-08
Supplement: Supplementary file 1 [file 5f558d83af0f0ee58acf58e0.xlsx]

## Sheet: Results for country deaths_both
Table S1. Global country burden of esophageal cancer attributable to diet low in vegetables in 1990 and 2021, and the temporal trends from 1990 to 2021.
	1990				2021				EAPC (1990-2021)
location	Deaths cases (No. × 103 (95% UI))	ASMR per 100000 (No. (95% UI))	DALYs (No. × 103 (95% UI))	ASDR per 100000 (No. (95% UI))	Deaths cases (No. × 103 (95% UI))	ASMR per 100000 (No. (95% UI))	DALYs (No. × 103 (95% UI))	ASDR per 100000 (No. (95% UI))	ASMR （No. (95% CI)）	ASDR (No. (95% CI))
Afghanistan	0.18 (-0.04-0.42)	2.65 (-0.56-6.07)	5.15 (-1.11-11.86)	69.79 (-15.11-159.7)	0.19 (-0.04-0.43)	2.07 (-0.46-4.52)	5.93 (-1.26-13.41)	52.26 (-11.6-115.79)	-0.99 (-1.14--0.84)	-1.16 (-1.32--0.99)
Albania	0.01 (0-0.02)	0.42 (-0.09-0.86)	0.22 (-0.05-0.43)	10.01 (-2.15-19.97)	0 (0-0.01)	0.06 (-0.01-0.17)	0.04 (-0.01-0.13)	0.98 (-0.14-3.06)	-7.97 (-8.73--7.2)	-9.56 (-10.51--8.6)
Algeria	0.02 (0-0.04)	0.18 (-0.04-0.36)	0.49 (-0.1-0.99)	4.02 (-0.83-8.06)	0.05 (-0.01-0.1)	0.15 (-0.03-0.31)	1.17 (-0.23-2.46)	3.21 (-0.65-6.7)	-0.53 (-0.58--0.48)	-0.76 (-0.81--0.71)
American Samoa	0 (0-0)	0.31 (-0.07-0.61)	0 (0-0)	7.33 (-1.74-14.54)	0 (0-0)	0.4 (-0.09-0.81)	0 (0-0.01)	9.58 (-2.14-19.2)	1.38 (1.01-1.75)	1.39 (1.03-1.76)
Andorra	0 (0-0)	0.34 (-0.06-0.78)	0 (0-0.01)	8.47 (-1.57-19.78)	0 (0-0)	0.21 (-0.04-0.46)	0.01 (0-0.02)	4.97 (-0.87-11.21)	-1.34 (-1.68--1)	-1.46 (-1.77--1.15)
Angola	0.13 (-0.02-0.26)	3.28 (-0.65-6.68)	3.83 (-0.75-7.93)	85.92 (-16.84-176.37)	0.22 (-0.04-0.45)	2 (-0.4-4.06)	6.52 (-1.3-13.16)	49.09 (-9.78-99.57)	-1.95 (-2.1--1.8)	-2.17 (-2.32--2.02)
Antigua and Barbuda	0 (0-0)	0.8 (-0.18-1.58)	0.01 (0-0.02)	19 (-4.3-37.26)	0 (0-0)	0.68 (-0.16-1.36)	0.02 (0-0.03)	15.51 (-3.53-30.63)	-0.41 (-0.62--0.2)	-0.5 (-0.71--0.29)
Argentina	0.53 (-0.13-1.06)	1.68 (-0.4-3.36)	12.6 (-3.03-25.25)	38.89 (-9.32-78)	0.53 (-0.13-1.07)	0.93 (-0.22-1.88)	11.47 (-2.7-23.25)	20.77 (-4.89-42.17)	-1.78 (-1.99--1.57)	-1.94 (-2.15--1.72)
Armenia	0.01 (0-0.02)	0.26 (-0.04-0.65)	0.16 (-0.03-0.41)	5.79 (-0.93-14.79)	0 (0-0)	0.01 (0-0.03)	0 (0-0.02)	0.09 (-0.01-0.38)	-15.22 (-16.67--13.74)	-17.43 (-19.18--15.64)
Australia	0.18 (-0.04-0.36)	0.92 (-0.2-1.82)	4.08 (-0.93-8.16)	20.96 (-4.78-41.9)	0.37 (-0.08-0.74)	0.78 (-0.18-1.57)	7.34 (-1.64-14.79)	17.06 (-3.82-34.54)	-0.59 (-0.68--0.5)	-0.68 (-0.77--0.59)
Austria	0.06 (-0.01-0.13)	0.56 (-0.13-1.13)	1.58 (-0.36-3.14)	14.71 (-3.33-29.29)	0.08 (-0.02-0.17)	0.47 (-0.11-0.95)	1.84 (-0.41-3.72)	11.15 (-2.51-22.51)	-0.4 (-0.49--0.32)	-0.73 (-0.83--0.63)
Azerbaijan	0.07 (-0.02-0.15)	1.51 (-0.34-3.22)	1.95 (-0.44-4.14)	37.3 (-8.52-78.86)	0.02 (0-0.06)	0.25 (-0.03-0.75)	0.46 (-0.05-1.46)	4.82 (-0.6-14.65)	-7.46 (-8.38--6.54)	-8.64 (-9.71--7.55)
Bahamas	0 (0-0)	1.22 (-0.27-2.51)	0.05 (-0.01-0.11)	32.44 (-7.25-66.64)	0 (0-0.01)	1.12 (-0.27-2.27)	0.13 (-0.03-0.26)	29.15 (-7.15-59.47)	0.08 (-0.1-0.27)	0.01 (-0.17-0.19)
Bahrain	0 (0-0)	0.63 (-0.13-1.39)	0.02 (0-0.05)	12.99 (-2.49-28.69)	0 (0-0)	0.26 (-0.05-0.58)	0.04 (-0.01-0.09)	4.68 (-0.84-10.67)	-3.72 (-4.04--3.4)	-4.17 (-4.49--3.85)
Bangladesh	0.69 (-0.14-1.44)	1.47 (-0.31-3.11)	20 (-4.17-41.09)	39.39 (-8.19-81.19)	1.19 (-0.24-2.62)	0.88 (-0.18-1.94)	31.33 (-6.2-68.61)	21.81 (-4.35-47.93)	-1.69 (-1.83--1.54)	-1.89 (-1.99--1.78)
Barbados	0 (0-0.01)	1.39 (-0.32-2.72)	0.09 (-0.02-0.17)	33.43 (-7.61-65.46)	0.01 (0-0.01)	1.18 (-0.26-2.42)	0.14 (-0.03-0.29)	27.52 (-6.1-56.61)	-0.52 (-0.65--0.39)	-0.53 (-0.65--0.41)
Belarus	0.08 (-0.02-0.16)	0.61 (-0.13-1.24)	2.22 (-0.48-4.54)	16.92 (-3.67-34.58)	0.05 (-0.01-0.11)	0.28 (-0.04-0.71)	1.19 (-0.18-3.01)	7.57 (-1.16-19.12)	-3.8 (-4.32--3.28)	-4.05 (-4.64--3.47)
Belgium	0.13 (-0.03-0.26)	0.85 (-0.18-1.71)	2.99 (-0.67-6.03)	20.99 (-4.67-42.34)	0.16 (-0.03-0.34)	0.66 (-0.14-1.4)	3.23 (-0.7-6.86)	15.17 (-3.26-32.07)	-0.85 (-0.98--0.72)	-1.2 (-1.36--1.03)
Belize	0 (0-0)	0.51 (-0.12-0.98)	0.01 (0-0.02)	12.49 (-2.99-24.56)	0 (0-0)	0.53 (-0.13-1.07)	0.04 (-0.01-0.09)	13.36 (-3.35-26.69)	0.4 (-0.04-0.85)	0.5 (0.07-0.93)
Benin	0.02 (0-0.03)	0.78 (-0.17-1.5)	0.4 (-0.08-0.76)	19.49 (-4.17-37.48)	0.06 (-0.01-0.13)	1.23 (-0.24-2.56)	1.67 (-0.34-3.47)	30 (-6.1-62.12)	2.07 (1.82-2.31)	1.99 (1.75-2.24)
Bermuda	0 (0-0)	1.38 (-0.31-2.82)	0.02 (0-0.04)	32.34 (-7.32-66.11)	0 (0-0)	0.85 (-0.18-1.74)	0.03 (-0.01-0.05)	19.72 (-4.12-40.12)	-1.22 (-1.44--1.01)	-1.28 (-1.49--1.06)
Bhutan	0 (0-0.01)	1.34 (-0.29-2.81)	0.1 (-0.02-0.19)	34.97 (-7.69-72.56)	0.01 (0-0.01)	0.88 (-0.19-1.86)	0.13 (-0.03-0.28)	21.05 (-4.31-44.8)	-1.42 (-1.63--1.21)	-1.74 (-1.95--1.52)
Bolivia (Plurinational State of)	0.02 (0-0.05)	0.74 (-0.15-1.6)	0.56 (-0.11-1.22)	17.05 (-3.49-36.83)	0.05 (-0.01-0.1)	0.6 (-0.14-1.23)	1.18 (-0.27-2.46)	12.79 (-2.93-26.63)	-0.66 (-0.72--0.59)	-0.94 (-1.02--0.86)
Bosnia and Herzegovina	0.02 (0-0.04)	0.51 (-0.11-1)	0.59 (-0.13-1.16)	13.03 (-2.85-25.64)	0.02 (0-0.04)	0.28 (-0.05-0.65)	0.4 (-0.07-0.95)	6.71 (-1.19-15.74)	-2.32 (-2.53--2.1)	-2.56 (-2.76--2.35)
Botswana	0.02 (0-0.04)	3.29 (-0.69-6.71)	0.51 (-0.11-1.06)	84.63 (-17.5-173.65)	0.03 (-0.01-0.06)	2.26 (-0.5-4.5)	0.89 (-0.19-1.78)	55.32 (-12.23-110.13)	-1.42 (-1.66--1.18)	-1.66 (-1.95--1.37)
Brazil	1.5 (-0.34-2.91)	1.72 (-0.39-3.35)	42.09 (-9.54-82.08)	44.06 (-9.98-85.87)	2.91 (-0.66-5.79)	1.15 (-0.26-2.29)	77.13 (-17.56-153.46)	29.92 (-6.81-59.56)	-1.27 (-1.32--1.22)	-1.28 (-1.34--1.22)
Brunei Darussalam	0 (0-0)	0.72 (-0.16-1.44)	0.02 (0-0.04)	17.02 (-3.69-34.39)	0 (0-0)	0.48 (-0.11-0.96)	0.04 (-0.01-0.08)	11.29 (-2.63-22.27)	-0.85 (-1.06--0.65)	-0.98 (-1.19--0.78)
Bulgaria	0.05 (-0.01-0.1)	0.38 (-0.08-0.8)	1.22 (-0.24-2.6)	9.84 (-1.98-20.97)	0.02 (0-0.05)	0.15 (-0.02-0.38)	0.46 (-0.07-1.18)	3.56 (-0.53-9.16)	-4.46 (-4.93--3.98)	-5.08 (-5.64--4.52)
Burkina Faso	0.04 (-0.01-0.07)	0.9 (-0.2-1.77)	1.01 (-0.22-1.98)	22.19 (-4.87-43.22)	0.14 (-0.03-0.28)	1.52 (-0.29-3.12)	3.68 (-0.73-7.51)	37.28 (-7.26-76.33)	2.4 (2.15-2.64)	2.36 (2.11-2.62)
Burundi	0.12 (-0.03-0.23)	5.28 (-1.16-10.12)	3.43 (-0.75-6.67)	139.4 (-30.53-269.2)	0.14 (-0.03-0.28)	2.98 (-0.59-6.05)	3.98 (-0.81-8.18)	73.45 (-14.82-150.21)	-2.48 (-2.73--2.22)	-2.74 (-3.01--2.47)
Cabo Verde	0.01 (0-0.01)	2.29 (-0.5-4.42)	0.12 (-0.03-0.23)	54.77 (-12.33-106.21)	0.01 (0-0.03)	3.25 (-0.71-6.76)	0.37 (-0.08-0.77)	79.83 (-17.69-166.36)	0.46 (-0.01-0.94)	0.58 (0.19-0.98)
Cambodia	0.05 (-0.01-0.1)	1.14 (-0.26-2.29)	1.5 (-0.34-2.97)	30.08 (-6.76-59.89)	0.1 (-0.02-0.19)	0.8 (-0.18-1.59)	2.65 (-0.6-5.36)	19.73 (-4.47-40.26)	-1.35 (-1.45--1.26)	-1.57 (-1.67--1.47)
Cameroon	0.04 (-0.01-0.08)	0.89 (-0.2-1.78)	1.06 (-0.24-2.13)	22.18 (-5.01-44.71)	0.18 (-0.04-0.38)	1.45 (-0.33-3.06)	5.08 (-1.17-10.97)	36.36 (-8.31-77.8)	2.01 (1.84-2.19)	2.02 (1.85-2.19)
Canada	0.23 (-0.05-0.47)	0.72 (-0.16-1.45)	5.37 (-1.21-10.89)	16.76 (-3.78-34.03)	0.53 (-0.12-1.08)	0.72 (-0.16-1.47)	11.19 (-2.48-22.97)	16.51 (-3.63-33.97)	0.18 (0.02-0.34)	0.16 (0-0.32)
Central African Republic	0.04 (-0.01-0.09)	3.93 (-0.8-7.89)	1.38 (-0.28-2.86)	105.16 (-21.34-215.67)	0.07 (-0.01-0.14)	3.09 (-0.65-6.31)	2.14 (-0.44-4.48)	80.87 (-17-167.55)	-0.91 (-1--0.82)	-1.02 (-1.12--0.91)
Chad	0.02 (0-0.04)	0.73 (-0.18-1.4)	0.53 (-0.13-1.04)	18.17 (-4.51-35.82)	0.09 (-0.02-0.17)	1.57 (-0.36-3.14)	2.46 (-0.58-4.96)	39.13 (-9.16-77.97)	3.06 (2.85-3.27)	3.04 (2.83-3.25)
Chile	0.16 (-0.04-0.33)	1.74 (-0.39-3.53)	3.72 (-0.82-7.54)	37.09 (-8.23-75.15)	0.16 (-0.04-0.33)	0.61 (-0.14-1.27)	3.06 (-0.68-6.36)	11.9 (-2.62-24.66)	-3.56 (-3.73--3.39)	-3.87 (-4.02--3.73)
China	44.44 (-9.52-87.87)	5.5 (-1.17-10.87)	1222.9 (-266.05-2420.38)	137.13 (-29.62-271.33)	8.4 (-1.62-24.33)	0.43 (-0.08-1.23)	166.49 (-32.85-485.5)	8.04 (-1.62-23.84)	-9.22 (-9.62--8.82)	-10.33 (-10.77--9.89)
Colombia	0.17 (-0.04-0.32)	1.01 (-0.23-1.98)	4.13 (-0.94-8.08)	22.84 (-5.2-44.65)	0.24 (-0.05-0.48)	0.43 (-0.09-0.87)	5.1 (-1.12-10.44)	9.24 (-2.02-18.89)	-3.27 (-3.43--3.11)	-3.37 (-3.53--3.21)
Comoros	0.01 (0-0.02)	4.76 (-1-9.23)	0.27 (-0.05-0.52)	123.04 (-25.39-237.85)	0.02 (0-0.03)	3.63 (-0.73-7.36)	0.46 (-0.09-0.95)	88.79 (-17.62-179.14)	-1.19 (-1.34--1.04)	-1.41 (-1.59--1.23)
Congo	0.05 (-0.01-0.09)	4.45 (-0.94-8.91)	1.37 (-0.28-2.77)	117.07 (-24.27-235.77)	0.08 (-0.02-0.17)	2.99 (-0.66-6.3)	2.32 (-0.51-4.94)	74.67 (-16.46-158.87)	-1.57 (-1.73--1.41)	-1.79 (-1.97--1.61)
Cook Islands	0 (0-0)	0.77 (-0.16-1.58)	0 (0-0)	17.9 (-3.81-36.7)	0 (0-0)	0.59 (-0.13-1.17)	0 (0-0.01)	13.87 (-3.02-28.24)	-0.88 (-0.97--0.8)	-0.79 (-0.86--0.71)
Costa Rica	0.01 (0-0.02)	0.68 (-0.17-1.34)	0.27 (-0.07-0.53)	15.22 (-3.77-30.07)	0.02 (0-0.04)	0.39 (-0.09-0.76)	0.48 (-0.11-0.93)	8.63 (-1.99-16.84)	-2.02 (-2.17--1.88)	-2.16 (-2.31--2)
C么te d'Ivoire	0.01 (0-0.02)	0.33 (-0.08-0.65)	0.37 (-0.09-0.73)	8.28 (-1.97-16.36)	0.04 (-0.01-0.07)	0.33 (-0.08-0.67)	1.03 (-0.24-2.1)	8.26 (-1.93-16.68)	0.02 (-0.14-0.18)	-0.03 (-0.2-0.14)
Croatia	0.05 (-0.01-0.1)	0.78 (-0.17-1.56)	1.32 (-0.29-2.65)	20.68 (-4.56-41.73)	0.05 (-0.01-0.09)	0.53 (-0.11-1.1)	1.09 (-0.23-2.22)	13.8 (-2.93-27.97)	-1.26 (-1.42--1.1)	-1.38 (-1.57--1.18)
Cuba	0.09 (-0.02-0.18)	0.88 (-0.2-1.75)	2.08 (-0.48-4.16)	20.36 (-4.7-40.77)	0.19 (-0.04-0.38)	0.93 (-0.19-1.94)	4.58 (-0.9-9.4)	23.78 (-4.7-49.13)	0.44 (0.29-0.59)	0.73 (0.6-0.86)
Cyprus	0 (0-0)	0.33 (-0.08-0.7)	0.05 (-0.01-0.11)	6.71 (-1.68-13.99)	0.01 (0-0.01)	0.29 (-0.07-0.61)	0.13 (-0.03-0.27)	6.35 (-1.46-13.26)	0.24 (0-0.49)	0.55 (0.31-0.79)
Czechia	0.09 (-0.02-0.17)	0.63 (-0.14-1.26)	2.22 (-0.52-4.45)	16.79 (-3.92-33.43)	0.14 (-0.03-0.27)	0.65 (-0.14-1.29)	3.2 (-0.7-6.39)	16.52 (-3.64-33.23)	0.06 (-0.04-0.16)	-0.12 (-0.26-0.01)
Democratic People's Republic of Korea	0.28 (-0.06-0.62)	1.79 (-0.38-4.03)	7.75 (-1.66-17.99)	44.51 (-9.49-100.98)	0.62 (-0.13-1.34)	1.85 (-0.39-4.02)	16.79 (-3.59-35.93)	48.6 (-10.37-103.33)	0.11 (-0.12-0.35)	0.23 (-0.03-0.48)
Democratic Republic of the Congo	0.41 (-0.1-0.84)	2.76 (-0.64-5.6)	12.04 (-2.78-25.01)	69.82 (-16.17-142.85)	0.81 (-0.16-1.67)	2.32 (-0.46-4.74)	23.7 (-4.84-48.72)	57.71 (-11.67-118.86)	-0.66 (-0.76--0.57)	-0.73 (-0.83--0.64)
Denmark	0.08 (-0.02-0.17)	1.05 (-0.24-2.09)	1.95 (-0.44-3.86)	26.47 (-5.99-52.6)	0.11 (-0.02-0.23)	0.91 (-0.18-1.85)	2.24 (-0.45-4.54)	20.31 (-4.13-41.02)	-0.68 (-0.84--0.52)	-1.05 (-1.21--0.89)
Djibouti	0.01 (0-0.01)	3.85 (-0.84-7.65)	0.16 (-0.03-0.31)	97.57 (-21.16-193.53)	0.02 (0-0.04)	3.04 (-0.7-6.4)	0.55 (-0.13-1.11)	74.27 (-17.09-151.73)	-1.05 (-1.18--0.92)	-1.19 (-1.34--1.05)
Dominica	0 (0-0)	1.14 (-0.26-2.28)	0.02 (0-0.03)	26.61 (-6.08-53.04)	0 (0-0)	1.14 (-0.27-2.34)	0.02 (-0.01-0.05)	27.65 (-6.45-57.64)	0.1 (-0.09-0.28)	0.3 (0.1-0.5)
Dominican Republic	0.02 (0-0.03)	0.49 (-0.11-1)	0.46 (-0.1-0.91)	11.84 (-2.65-23.62)	0.05 (-0.01-0.11)	0.51 (-0.14-1.09)	1.33 (-0.37-2.79)	12.96 (-3.59-27.32)	0.67 (0.49-0.86)	0.81 (0.62-1.01)
Ecuador	0.03 (-0.01-0.06)	0.58 (-0.14-1.14)	0.69 (-0.16-1.34)	12.8 (-3-24.96)	0.05 (-0.01-0.1)	0.33 (-0.08-0.64)	1.1 (-0.24-2.14)	6.74 (-1.5-13.1)	-1.46 (-1.73--1.19)	-1.77 (-2.05--1.49)
Egypt	0.02 (0-0.06)	0.11 (-0.02-0.26)	0.59 (-0.1-1.63)	2.19 (-0.36-5.68)	0 (0-0.01)	0.01 (0-0.04)	0.07 (-0.01-0.29)	0.17 (-0.03-0.6)	-7.99 (-9.06--6.9)	-9.62 (-10.98--8.24)
El Salvador	0.01 (0-0.03)	0.5 (-0.12-0.99)	0.36 (-0.09-0.71)	11.91 (-2.9-23.43)	0.03 (-0.01-0.05)	0.41 (-0.09-0.82)	0.59 (-0.13-1.21)	9.57 (-2.08-19.77)	-1.03 (-1.23--0.83)	-1.05 (-1.27--0.82)
Equatorial Guinea	0.01 (0-0.01)	3.73 (-0.82-7.36)	0.21 (-0.05-0.43)	98.91 (-21.87-195.91)	0.01 (0-0.02)	2.36 (-0.54-4.96)	0.33 (-0.08-0.69)	57.23 (-13.62-120.48)	-1.71 (-2.09--1.32)	-2.06 (-2.48--1.63)
Eritrea	0.06 (-0.01-0.13)	5.6 (-1.23-11.53)	2.12 (-0.47-4.31)	151.41 (-33.4-312.25)	0.11 (-0.02-0.23)	4.05 (-0.89-8.49)	3.23 (-0.72-6.96)	101.34 (-22.32-214.27)	-1.18 (-1.26--1.09)	-1.45 (-1.54--1.36)
Estonia	0.02 (0-0.03)	0.74 (-0.18-1.48)	0.41 (-0.1-0.82)	20.15 (-4.83-40.26)	0.01 (0-0.03)	0.5 (-0.09-1.03)	0.3 (-0.06-0.62)	12.56 (-2.33-26.2)	-1.65 (-1.86--1.44)	-1.96 (-2.16--1.76)
Eswatini	0.01 (0-0.03)	4.46 (-1-8.99)	0.37 (-0.08-0.76)	117.14 (-26.28-237.38)	0.03 (-0.01-0.05)	4.52 (-1.03-9.01)	0.8 (-0.19-1.63)	123.63 (-28.93-250.3)	0.31 (-0.32-0.94)	0.43 (-0.27-1.13)
Ethiopia	0.52 (-0.13-1.03)	2.66 (-0.69-5.35)	15.28 (-3.88-30.76)	69.41 (-17.79-138.96)	0.57 (-0.14-1.09)	1.39 (-0.33-2.69)	15.36 (-3.61-29.36)	33.31 (-7.92-63.72)	-2.56 (-2.75--2.36)	-2.86 (-3.06--2.66)
Fiji	0 (0-0)	0.62 (-0.13-1.23)	0.06 (-0.01-0.12)	14.86 (-3.26-29.41)	0 (0-0.01)	0.68 (-0.14-1.39)	0.12 (-0.03-0.25)	15.49 (-3.23-31.96)	0.47 (0.3-0.64)	0.4 (0.2-0.6)
Finland	0.05 (-0.01-0.11)	0.75 (-0.17-1.5)	1.22 (-0.28-2.44)	17.83 (-4.09-35.64)	0.08 (-0.02-0.16)	0.61 (-0.14-1.22)	1.58 (-0.37-3.17)	14.12 (-3.34-28.16)	-0.63 (-0.74--0.53)	-0.67 (-0.75--0.59)
France	1.32 (-0.3-2.64)	1.67 (-0.38-3.36)	33.46 (-7.61-67.04)	45.16 (-10.22-90.56)	1.1 (-0.26-2.21)	0.79 (-0.18-1.58)	23.08 (-5.45-46.19)	18.98 (-4.47-37.89)	-2.45 (-2.57--2.32)	-2.83 (-2.97--2.69)
Gabon	0.02 (0-0.04)	3.32 (-0.7-6.68)	0.5 (-0.11-1)	84.72 (-17.84-169)	0.03 (-0.01-0.06)	2.77 (-0.61-5.63)	0.79 (-0.18-1.63)	68.46 (-15.26-139.65)	-0.74 (-0.85--0.63)	-0.86 (-0.97--0.74)
Gambia	0 (0-0)	0.42 (-0.1-0.83)	0.04 (-0.01-0.08)	10.47 (-2.34-20.76)	0.01 (0-0.01)	0.53 (-0.1-1.07)	0.14 (-0.03-0.28)	13.23 (-2.61-26.53)	0.76 (0.65-0.87)	0.7 (0.56-0.84)
Georgia	0.02 (-0.01-0.05)	0.39 (-0.09-0.83)	0.62 (-0.14-1.32)	9.68 (-2.19-20.49)	0.01 (0-0.03)	0.23 (-0.05-0.47)	0.32 (-0.07-0.66)	5.53 (-1.18-11.44)	-1.19 (-1.61--0.78)	-1.32 (-1.7--0.94)
Germany	0.89 (-0.2-1.78)	0.72 (-0.17-1.45)	23.11 (-5.34-46.95)	19.91 (-4.6-40.62)	1.47 (-0.33-3)	0.78 (-0.17-1.58)	32.06 (-7.09-64.58)	19.03 (-4.18-38.18)	-0.02 (-0.2-0.16)	-0.45 (-0.64--0.26)
Ghana	0.04 (-0.01-0.07)	0.62 (-0.14-1.23)	1.05 (-0.23-2.07)	15.51 (-3.45-30.66)	0.14 (-0.03-0.29)	0.88 (-0.17-1.81)	3.74 (-0.73-7.74)	20.91 (-4.02-43.79)	1.66 (1.48-1.85)	1.5 (1.31-1.69)
Greece	0 (0-0.01)	0.02 (0-0.06)	0.03 (0-0.1)	0.21 (-0.02-0.73)	0.03 (0-0.07)	0.09 (-0.01-0.26)	0.42 (-0.05-1.24)	1.83 (-0.22-5.6)	5.91 (5.58-6.23)	8.49 (8.07-8.9)
Greenland	0 (0-0)	3.19 (-0.68-6.66)	0.03 (-0.01-0.06)	80.69 (-16.91-166.77)	0 (0-0)	1.77 (-0.36-3.69)	0.03 (-0.01-0.07)	42.49 (-8.24-89.19)	-1.86 (-1.93--1.78)	-2.02 (-2.11--1.93)
Grenada	0 (0-0)	1.75 (-0.39-3.4)	0.03 (-0.01-0.06)	45.4 (-10.34-88.51)	0 (0-0)	1.2 (-0.25-2.35)	0.04 (-0.01-0.07)	30.22 (-6.29-59.52)	-0.79 (-1.28--0.3)	-0.77 (-1.18--0.35)
Guam	0 (0-0)	0.57 (-0.13-1.15)	0.01 (0-0.02)	13.1 (-3-25.83)	0 (0-0)	0.42 (-0.09-0.82)	0.02 (0-0.05)	11.64 (-2.41-22.75)	-0.18 (-0.56-0.21)	0.46 (0.1-0.83)
Guatemala	0.02 (0-0.04)	0.69 (-0.17-1.35)	0.54 (-0.13-1.05)	15.06 (-3.68-29.42)	0.04 (-0.01-0.09)	0.41 (-0.1-0.83)	1.03 (-0.24-2.1)	9.18 (-2.16-18.69)	-1.91 (-2.16--1.67)	-1.82 (-2.06--1.58)
Guinea	0.01 (0-0.02)	0.3 (-0.08-0.61)	0.26 (-0.06-0.52)	7.5 (-1.86-15.03)	0.02 (0-0.04)	0.35 (-0.07-0.74)	0.52 (-0.11-1.1)	8.69 (-1.82-18.42)	0.74 (0.58-0.9)	0.74 (0.57-0.91)
Guinea-Bissau	0.01 (0-0.01)	1.34 (-0.3-2.57)	0.15 (-0.03-0.29)	35.29 (-7.86-67.9)	0.01 (0-0.03)	2.08 (-0.44-4.12)	0.44 (-0.09-0.89)	53.43 (-11.19-107.4)	2.08 (1.84-2.33)	2 (1.76-2.24)
Guyana	0 (0-0)	0.57 (-0.13-1.11)	0.06 (-0.01-0.12)	14.62 (-3.36-28.65)	0 (0-0.01)	0.49 (-0.11-1)	0.09 (-0.02-0.19)	12.87 (-2.8-26.88)	-0.21 (-0.39--0.04)	-0.06 (-0.24-0.13)
Haiti	0.05 (-0.01-0.09)	1.46 (-0.3-2.93)	1.29 (-0.27-2.6)	37 (-7.68-74.23)	0.08 (-0.02-0.16)	1.13 (-0.25-2.33)	2.23 (-0.49-4.67)	28.04 (-6.15-58.79)	-0.66 (-0.74--0.58)	-0.71 (-0.8--0.62)
Honduras	0.01 (0-0.01)	0.28 (-0.06-0.55)	0.14 (-0.03-0.27)	6.54 (-1.49-12.82)	0.02 (0-0.05)	0.37 (-0.09-0.78)	0.52 (-0.12-1.11)	8.14 (-1.84-17.36)	1.28 (1.1-1.45)	0.98 (0.83-1.13)
Hungary	0.13 (-0.03-0.25)	0.89 (-0.2-1.76)	3.73 (-0.84-7.32)	26.96 (-6.08-53.01)	0.09 (-0.02-0.19)	0.47 (-0.11-1.01)	2.15 (-0.49-4.63)	12.46 (-2.85-26.8)	-2.76 (-3.05--2.47)	-3.33 (-3.67--2.99)
Iceland	0 (0-0.01)	1.07 (-0.24-2.08)	0.07 (-0.02-0.14)	25.31 (-5.78-49.81)	0 (0-0.01)	0.84 (-0.19-1.7)	0.11 (-0.02-0.21)	19.46 (-4.23-38.89)	-0.86 (-1.01--0.71)	-0.98 (-1.14--0.82)
India	3.98 (-0.99-8.07)	0.86 (-0.22-1.74)	121.01 (-30.11-244.63)	23.03 (-5.75-46.67)	8.48 (-1.89-17.05)	0.72 (-0.16-1.45)	234.67 (-51.79-472.34)	18.56 (-4.11-37.33)	-0.8 (-0.9--0.69)	-0.94 (-1.05--0.83)
Indonesia	0.47 (-0.11-0.92)	0.49 (-0.12-0.96)	13.88 (-3.25-27.38)	12.64 (-2.99-24.96)	0.89 (-0.21-1.87)	0.4 (-0.09-0.82)	24.76 (-5.9-52.1)	9.48 (-2.27-19.82)	-0.68 (-0.72--0.64)	-0.93 (-0.97--0.89)
Iran (Islamic Republic of)	0.25 (-0.05-0.5)	1.09 (-0.23-2.19)	6.83 (-1.49-13.76)	25.08 (-5.44-50.45)	0.26 (-0.05-0.6)	0.38 (-0.07-0.88)	5.42 (-0.9-12.58)	7.14 (-1.22-16.63)	-4.07 (-4.44--3.7)	-4.84 (-5.27--4.41)
Iraq	0.01 (0-0.03)	0.18 (-0.04-0.4)	0.37 (-0.07-0.84)	4.46 (-0.91-10.17)	0.03 (-0.01-0.08)	0.16 (-0.03-0.37)	0.87 (-0.17-2.08)	3.52 (-0.71-8.34)	-1.6 (-1.91--1.29)	-2.05 (-2.39--1.71)
Ireland	0.07 (-0.02-0.14)	1.73 (-0.4-3.38)	1.56 (-0.36-3.08)	39.09 (-9.13-77.74)	0.08 (-0.02-0.18)	1.04 (-0.22-2.16)	1.74 (-0.37-3.6)	22.65 (-4.84-47)	-1.42 (-1.54--1.29)	-1.54 (-1.67--1.41)
Israel	0.01 (0-0.02)	0.17 (-0.03-0.41)	0.15 (-0.02-0.38)	3.08 (-0.51-7.97)	0.01 (0-0.02)	0.04 (-0.01-0.13)	0.09 (-0.01-0.28)	0.71 (-0.11-2.18)	-3.82 (-4.88--2.75)	-4.22 (-5.57--2.86)
Italy	0.3 (-0.06-0.68)	0.34 (-0.06-0.77)	6.41 (-1.16-14.72)	7.52 (-1.36-17.21)	0.4 (-0.08-0.83)	0.27 (-0.05-0.55)	7.84 (-1.6-16.31)	6.03 (-1.24-12.62)	-0.35 (-0.53--0.17)	-0.24 (-0.44--0.03)
Jamaica	0.01 (0-0.03)	0.71 (-0.17-1.41)	0.28 (-0.07-0.57)	16.43 (-3.83-32.92)	0.02 (0-0.04)	0.69 (-0.15-1.44)	0.51 (-0.11-1.07)	16.45 (-3.57-34.55)	-0.02 (-0.45-0.41)	0.04 (-0.43-0.5)
Japan	1.36 (-0.29-2.8)	0.8 (-0.17-1.64)	32.36 (-6.71-66.62)	18.66 (-3.87-38.43)	1.45 (-0.28-3.32)	0.37 (-0.07-0.85)	25.64 (-4.6-58.9)	8.12 (-1.4-18.61)	-2.34 (-2.54--2.13)	-2.52 (-2.7--2.34)
Jordan	0 (0-0.01)	0.25 (-0.05-0.5)	0.09 (-0.02-0.18)	5.9 (-1.25-12.24)	0.01 (0-0.02)	0.17 (-0.04-0.36)	0.31 (-0.07-0.66)	3.89 (-0.87-8.19)	-1.46 (-1.72--1.2)	-1.71 (-2--1.42)
Kazakhstan	0.51 (-0.12-1.03)	4.13 (-0.95-8.37)	13.18 (-2.99-26.93)	101.14 (-23.02-205.97)	0.05 (-0.01-0.14)	0.32 (-0.05-0.85)	1.12 (-0.15-3.22)	6.45 (-0.92-18.17)	-9.44 (-10.19--8.7)	-10.3 (-11.12--9.47)
Kenya	0.18 (-0.04-0.39)	2.3 (-0.49-4.85)	5.09 (-1.03-10.67)	57.96 (-11.9-122.12)	0.62 (-0.12-1.32)	2.91 (-0.58-6.16)	17.28 (-3.44-36.96)	69.65 (-13.9-148.28)	1.21 (1-1.43)	0.99 (0.77-1.21)
Kiribati	0 (0-0)	1.62 (-0.34-3.33)	0.02 (0-0.03)	41.38 (-8.45-85.24)	0 (0-0)	1.46 (-0.35-3.02)	0.03 (-0.01-0.06)	36.67 (-8.75-76.82)	-0.45 (-0.55--0.36)	-0.51 (-0.61--0.42)
Kuwait	0 (0-0)	0.23 (-0.05-0.52)	0.03 (-0.01-0.08)	5.14 (-0.98-11.62)	0 (0-0)	0.07 (-0.01-0.18)	0.04 (-0.01-0.11)	1.4 (-0.22-3.51)	-4.04 (-4.84--3.23)	-4.5 (-5.47--3.52)
Kyrgyzstan	0.04 (-0.01-0.09)	1.46 (-0.3-3.13)	1.14 (-0.23-2.5)	37.23 (-7.68-80.93)	0.01 (0-0.03)	0.32 (-0.05-0.73)	0.35 (-0.05-0.82)	7.13 (-1.12-16.53)	-5.47 (-5.81--5.13)	-6.11 (-6.5--5.73)
Lao People's Democratic Republic	0.03 (-0.01-0.05)	1.21 (-0.27-2.41)	0.74 (-0.16-1.5)	32.5 (-7.11-65.41)	0.03 (-0.01-0.06)	0.59 (-0.12-1.23)	0.75 (-0.15-1.57)	14.69 (-3-30.8)	-2.56 (-2.71--2.42)	-2.84 (-2.99--2.69)
Latvia	0.02 (-0.01-0.05)	0.63 (-0.14-1.27)	0.61 (-0.14-1.24)	17.13 (-3.95-34.75)	0.02 (0-0.04)	0.55 (-0.11-1.13)	0.51 (-0.1-1.03)	14.77 (-3.02-30.24)	-0.53 (-0.71--0.35)	-0.73 (-0.94--0.51)
Lebanon	0 (0-0)	0.01 (0-0.04)	0 (0-0.01)	0.17 (-0.03-0.6)	0 (0-0.01)	0.02 (0-0.08)	0.03 (0-0.09)	0.41 (-0.04-1.36)	4.49 (3.44-5.54)	5.85 (4.61-7.12)
Lesotho	0.02 (-0.01-0.05)	2.81 (-0.62-5.61)	0.63 (-0.14-1.27)	71.15 (-15.79-143.74)	0.05 (-0.01-0.09)	4.29 (-0.87-8.43)	1.36 (-0.28-2.7)	115.76 (-23.66-229.55)	1.99 (1.55-2.44)	2.19 (1.69-2.69)
Liberia	0.01 (0-0.02)	0.85 (-0.19-1.64)	0.25 (-0.05-0.48)	20.92 (-4.53-40.32)	0.03 (-0.01-0.07)	1.57 (-0.38-3.27)	0.93 (-0.22-2)	38.84 (-9.26-82.79)	2.58 (2.27-2.89)	2.57 (2.25-2.9)
Libya	0 (0-0.01)	0.24 (-0.05-0.54)	0.11 (-0.02-0.27)	5.81 (-1.24-13.36)	0.02 (0-0.04)	0.34 (-0.08-0.76)	0.49 (-0.11-1.07)	8.36 (-1.93-18.55)	1.39 (1.17-1.62)	1.37 (1.14-1.61)
Lithuania	0.03 (-0.01-0.06)	0.69 (-0.15-1.37)	0.85 (-0.19-1.71)	18.84 (-4.3-37.7)	0.04 (-0.01-0.07)	0.66 (-0.14-1.33)	0.89 (-0.19-1.8)	17.76 (-3.78-36)	-0.18 (-0.35--0.01)	-0.3 (-0.52--0.08)
Luxembourg	0.01 (0-0.01)	1.05 (-0.24-2.1)	0.14 (-0.03-0.28)	26.41 (-5.98-52.97)	0.01 (0-0.01)	0.67 (-0.15-1.36)	0.16 (-0.04-0.32)	15.41 (-3.45-30.69)	-1.44 (-1.6--1.28)	-1.8 (-1.98--1.62)
Madagascar	0.2 (-0.04-0.39)	4.02 (-0.87-7.84)	5.75 (-1.24-11.22)	104.46 (-22.54-201.87)	0.33 (-0.07-0.7)	3.07 (-0.61-6.4)	10.02 (-1.96-21.29)	76.89 (-15.23-163.1)	-0.98 (-1.07--0.9)	-1.1 (-1.19--1.01)
Malawi	0.21 (-0.06-0.42)	5.79 (-1.52-11.54)	6.28 (-1.6-12.18)	149.09 (-38.46-290.69)	0.52 (-0.11-1.03)	7.14 (-1.49-14.24)	15.22 (-3.18-30.34)	183.5 (-38.25-365.79)	0.64 (0.27-1.02)	0.6 (0.2-1.01)
Malaysia	0.06 (-0.01-0.12)	0.69 (-0.16-1.34)	1.64 (-0.39-3.14)	17.01 (-4.06-32.82)	0.17 (-0.04-0.32)	0.6 (-0.13-1.18)	4.27 (-0.89-8.37)	14.45 (-3.02-28.29)	-0.63 (-0.78--0.49)	-0.68 (-0.86--0.5)
Maldives	0 (0-0)	0.74 (-0.17-1.49)	0.02 (0-0.04)	19.35 (-4.29-39.22)	0 (0-0)	0.26 (-0.05-0.54)	0.02 (0-0.05)	5.97 (-1.21-12.21)	-3.82 (-4.05--3.59)	-4.33 (-4.59--4.07)
Mali	0.03 (-0.01-0.05)	0.67 (-0.17-1.28)	0.72 (-0.18-1.39)	16.74 (-4.13-32.12)	0.06 (-0.01-0.12)	0.67 (-0.13-1.36)	1.57 (-0.3-3.22)	16.4 (-3.17-33.77)	0.29 (0.16-0.42)	0.21 (0.07-0.34)
Malta	0 (0-0)	0.58 (-0.13-1.17)	0.06 (-0.01-0.12)	13.6 (-2.91-27.56)	0 (0-0.01)	0.25 (-0.04-0.57)	0.05 (-0.01-0.11)	5.25 (-0.84-12.62)	-2.85 (-2.95--2.74)	-3.13 (-3.25--3.01)
Marshall Islands	0 (0-0)	0.77 (-0.16-1.58)	0 (0-0.01)	19.22 (-4.01-38.88)	0 (0-0)	0.68 (-0.15-1.38)	0.01 (0-0.01)	16.96 (-3.86-35.21)	-0.32 (-0.4--0.23)	-0.33 (-0.41--0.25)
Mauritania	0.01 (0-0.02)	1.02 (-0.24-1.93)	0.26 (-0.06-0.49)	25.39 (-5.9-47.9)	0.03 (-0.01-0.06)	1.44 (-0.36-2.9)	0.76 (-0.19-1.56)	33.94 (-8.43-69.3)	1.51 (1.19-1.82)	1.29 (0.98-1.61)
Mauritius	0.01 (0-0.01)	0.88 (-0.2-1.71)	0.17 (-0.04-0.33)	22.14 (-5.06-43.05)	0.01 (0-0.03)	0.76 (-0.17-1.49)	0.38 (-0.08-0.75)	20.08 (-4.35-39.98)	-0.98 (-1.39--0.57)	-0.89 (-1.33--0.46)
Mexico	0.22 (-0.05-0.42)	0.57 (-0.13-1.11)	5.31 (-1.19-10.4)	12.21 (-2.73-23.94)	0.42 (-0.1-0.86)	0.34 (-0.08-0.69)	10.24 (-2.55-21.08)	7.89 (-1.97-16.23)	-1.58 (-1.72--1.45)	-1.33 (-1.47--1.19)
Micronesia (Federated States of)	0 (0-0)	0.88 (-0.16-1.73)	0.01 (0-0.02)	22.3 (-4.07-44.23)	0 (0-0)	0.73 (-0.16-1.5)	0.02 (0-0.03)	18.29 (-4-37.75)	-0.72 (-0.76--0.68)	-0.73 (-0.78--0.69)
Monaco	0 (0-0)	0.38 (-0.05-0.99)	0.01 (0-0.01)	8.15 (-1.25-21.66)	0 (0-0)	0.25 (-0.04-0.69)	0 (0-0.01)	4.93 (-0.81-15.15)	-1 (-1.42--0.59)	-1.2 (-1.62--0.77)
Mongolia	0.07 (-0.01-0.13)	6.72 (-1.49-13.31)	1.69 (-0.38-3.28)	157.63 (-35.45-308.33)	0.08 (-0.02-0.17)	4.17 (-0.97-8.2)	2.14 (-0.52-4.31)	91.44 (-21.85-183.43)	-1.99 (-2.14--1.83)	-2.19 (-2.36--2.03)
Montenegro	0 (0-0)	0.12 (-0.02-0.32)	0.02 (0-0.05)	2.99 (-0.44-8.12)	0 (0-0)	0.07 (-0.01-0.21)	0.01 (0-0.04)	1.3 (-0.15-4.19)	-4.61 (-5.77--3.43)	-6.01 (-7.38--4.63)
Morocco	0.03 (-0.01-0.05)	0.19 (-0.04-0.37)	0.68 (-0.15-1.36)	4.64 (-1.01-9.2)	0.04 (-0.01-0.1)	0.13 (-0.03-0.3)	1.08 (-0.2-2.41)	3.04 (-0.58-6.82)	-1.27 (-1.51--1.02)	-1.6 (-1.86--1.34)
Mozambique	0.12 (-0.03-0.24)	2.26 (-0.53-4.48)	3.18 (-0.76-6.4)	51.97 (-12.34-104.12)	0.26 (-0.05-0.52)	2.56 (-0.5-5.14)	7.1 (-1.37-14.45)	60.49 (-11.73-122.64)	0.85 (0.68-1.01)	0.98 (0.79-1.17)
Myanmar	0.24 (-0.05-0.47)	1.03 (-0.23-2.03)	6.99 (-1.55-14.29)	27.49 (-6.15-55.68)	0.25 (-0.05-0.56)	0.52 (-0.11-1.17)	6.76 (-1.41-15.18)	13.03 (-2.71-29.31)	-2.55 (-2.69--2.41)	-2.82 (-2.96--2.67)
Namibia	0 (0-0.01)	0.66 (-0.16-1.25)	0.12 (-0.03-0.24)	17.39 (-4.09-33.5)	0.01 (0-0.02)	0.6 (-0.14-1.18)	0.25 (-0.06-0.5)	15.98 (-3.83-32.05)	-0.58 (-0.89--0.27)	-0.59 (-0.94--0.24)
Nauru	0 (0-0)	1.04 (-0.22-2.08)	0 (0-0)	26.52 (-5.67-52.91)	0 (0-0)	0.84 (-0.19-1.75)	0 (0-0)	21.83 (-5.11-46.2)	-0.91 (-1.07--0.75)	-0.9 (-1.08--0.72)
Nepal	0.12 (-0.03-0.24)	1.3 (-0.29-2.57)	3.55 (-0.81-7.11)	33.98 (-7.68-67.35)	0.21 (-0.04-0.45)	0.92 (-0.18-2.01)	5.53 (-1.08-12.23)	22.69 (-4.44-49.9)	-1.02 (-1.41--0.62)	-1.23 (-1.64--0.83)
Netherlands	0.21 (-0.05-0.41)	1.05 (-0.24-2.07)	4.77 (-1.1-9.4)	24.95 (-5.73-49.26)	0.49 (-0.11-1)	1.34 (-0.29-2.74)	9.98 (-2.18-20.44)	29.51 (-6.45-60.32)	0.85 (0.59-1.1)	0.62 (0.32-0.91)
New Zealand	0.04 (-0.01-0.08)	1.01 (-0.22-2)	0.86 (-0.19-1.7)	21.95 (-4.83-43.4)	0.06 (-0.01-0.12)	0.68 (-0.15-1.36)	1.17 (-0.26-2.34)	14.07 (-3.1-28.17)	-1.26 (-1.45--1.07)	-1.46 (-1.63--1.3)
Nicaragua	0 (0-0.01)	0.3 (-0.07-0.58)	0.11 (-0.03-0.21)	6.84 (-1.6-13.39)	0.01 (0-0.02)	0.23 (-0.05-0.46)	0.27 (-0.06-0.53)	5.37 (-1.25-10.59)	-0.74 (-0.98--0.5)	-0.76 (-0.97--0.54)
Niger	0.02 (0-0.04)	0.7 (-0.14-1.4)	0.53 (-0.11-1.06)	17.46 (-3.56-35.11)	0.08 (-0.02-0.16)	1 (-0.22-2.08)	2.08 (-0.48-4.4)	23.81 (-5.42-49.8)	1.81 (1.53-2.09)	1.65 (1.37-1.93)
Nigeria	0.28 (-0.06-0.58)	0.66 (-0.14-1.35)	7.62 (-1.63-15.85)	16.38 (-3.52-33.99)	0.86 (-0.2-1.79)	1.02 (-0.23-2.13)	23.31 (-5.43-48.55)	23.72 (-5.48-49.07)	1.99 (1.75-2.23)	1.74 (1.52-1.95)
Niue	0 (0-0)	0.62 (-0.14-1.24)	0 (0-0)	14.98 (-3.39-30.04)	0 (0-0)	0.62 (-0.14-1.22)	0 (0-0)	14.73 (-3.2-29.35)	-0.23 (-0.33--0.13)	-0.31 (-0.42--0.21)
North Macedonia	0 (0-0)	0.11 (-0.02-0.28)	0.05 (-0.01-0.13)	2.4 (-0.36-6.52)	0 (0-0.01)	0.07 (-0.01-0.19)	0.05 (-0.01-0.14)	1.44 (-0.25-4.35)	-2.48 (-3.35--1.61)	-3.01 (-3.94--2.06)
Northern Mariana Islands	0 (0-0)	0.34 (-0.07-0.68)	0 (0-0)	7.97 (-1.66-15.9)	0 (0-0)	0.64 (-0.13-1.26)	0.01 (0-0.02)	14.65 (-2.96-28.61)	3.07 (2.49-3.66)	3.12 (2.54-3.7)
Norway	0.04 (-0.01-0.08)	0.58 (-0.13-1.14)	0.85 (-0.19-1.67)	13.74 (-3.09-27.07)	0.07 (-0.01-0.13)	0.64 (-0.14-1.28)	1.33 (-0.3-2.67)	13.93 (-3.09-27.94)	0.24 (0.06-0.41)	0.01 (-0.14-0.16)
Oman	0 (0-0.01)	0.41 (-0.09-0.85)	0.07 (-0.02-0.15)	9.88 (-2.27-20.8)	0.01 (0-0.01)	0.29 (-0.07-0.61)	0.14 (-0.03-0.3)	6.54 (-1.47-13.59)	-0.78 (-0.92--0.63)	-1.1 (-1.25--0.95)
Pakistan	0.93 (-0.22-1.85)	1.69 (-0.4-3.36)	25.33 (-6.03-50.46)	42.76 (-10.15-85.01)	1.94 (-0.46-4.08)	1.65 (-0.4-3.44)	55.6 (-13.32-117.54)	41.15 (-9.87-86.69)	-0.4 (-0.6--0.19)	-0.48 (-0.7--0.26)
Palau	0 (0-0)	0.85 (-0.19-1.61)	0 (0-0)	19.46 (-4.3-37.56)	0 (0-0)	0.76 (-0.15-1.52)	0 (0-0.01)	17.11 (-3.34-35.17)	-0.31 (-0.36--0.27)	-0.38 (-0.43--0.34)
Palestine	0 (0-0.01)	0.39 (-0.09-0.8)	0.07 (-0.02-0.16)	8.51 (-1.89-17.66)	0 (0-0.01)	0.19 (-0.04-0.39)	0.1 (-0.02-0.21)	4.02 (-0.93-8.23)	-2.82 (-3--2.63)	-3.1 (-3.34--2.85)
Panama	0.01 (0-0.01)	0.5 (-0.12-0.98)	0.16 (-0.04-0.32)	10.99 (-2.7-21.27)	0.01 (0-0.03)	0.31 (-0.07-0.62)	0.3 (-0.07-0.6)	6.82 (-1.51-13.56)	-1.41 (-1.57--1.25)	-1.42 (-1.58--1.26)
Papua New Guinea	0.01 (0-0.02)	0.49 (-0.1-1.03)	0.24 (-0.05-0.52)	12 (-2.33-25.87)	0.02 (0-0.04)	0.41 (-0.08-0.86)	0.55 (-0.11-1.14)	9.75 (-1.92-20.23)	-0.63 (-0.67--0.59)	-0.75 (-0.8--0.7)
Paraguay	0.02 (0-0.03)	0.81 (-0.19-1.6)	0.45 (-0.11-0.89)	19.74 (-4.74-39.06)	0.06 (-0.01-0.12)	1 (-0.21-2.05)	1.48 (-0.31-3.08)	24.59 (-5.11-51.03)	0.69 (0.56-0.82)	0.67 (0.54-0.81)
Peru	0.05 (-0.01-0.1)	0.46 (-0.1-0.9)	1.22 (-0.26-2.42)	10.06 (-2.17-19.9)	0.1 (-0.02-0.21)	0.31 (-0.07-0.64)	2.23 (-0.48-4.59)	6.64 (-1.42-13.64)	-1.56 (-1.86--1.26)	-1.73 (-2.04--1.42)
Philippines	0.1 (-0.02-0.2)	0.35 (-0.08-0.68)	3.02 (-0.69-5.94)	8.93 (-2.05-17.63)	0.26 (-0.06-0.53)	0.31 (-0.07-0.64)	7.37 (-1.64-15.04)	8.15 (-1.81-16.66)	-0.24 (-0.31--0.17)	-0.3 (-0.38--0.22)
Poland	0.26 (-0.05-0.54)	0.6 (-0.12-1.24)	6.61 (-1.31-13.88)	15.26 (-3.02-32.02)	0.21 (-0.04-0.49)	0.3 (-0.05-0.67)	4.81 (-0.8-10.9)	7.19 (-1.21-16.16)	-2.65 (-2.9--2.4)	-2.83 (-3.11--2.55)
Portugal	0.1 (-0.02-0.21)	0.71 (-0.15-1.57)	2.19 (-0.45-4.92)	16.31 (-3.37-36.57)	0.09 (-0.02-0.2)	0.36 (-0.07-0.84)	1.83 (-0.34-4.36)	8.7 (-1.58-20.95)	-1.56 (-1.77--1.35)	-1.27 (-1.53--1.01)
Puerto Rico	0.06 (-0.01-0.12)	1.67 (-0.41-3.21)	1.41 (-0.34-2.73)	39.31 (-9.51-76.16)	0.04 (-0.01-0.08)	0.59 (-0.13-1.15)	0.89 (-0.19-1.74)	14.56 (-3.08-28.46)	-3.34 (-3.54--3.13)	-3.13 (-3.34--2.92)
Qatar	0 (0-0)	0.39 (-0.06-1.04)	0.01 (0-0.02)	7.33 (-1.17-20.55)	0 (0-0)	0.06 (-0.01-0.2)	0.01 (0-0.03)	1.02 (-0.15-3.4)	-7.73 (-8.37--7.07)	-7.97 (-8.59--7.35)
Republic of Korea	0.11 (-0.02-0.28)	0.43 (-0.07-1.06)	2.77 (-0.42-7.41)	9.24 (-1.45-23.77)	0.29 (-0.05-0.71)	0.3 (-0.06-0.74)	5.76 (-1.06-14.45)	6.03 (-1.11-15.13)	-1.14 (-1.32--0.97)	-1.21 (-1.42--1.01)
Republic of Moldova	0.02 (0-0.04)	0.45 (-0.1-0.92)	0.53 (-0.12-1.11)	11.64 (-2.6-24.17)	0.02 (0-0.05)	0.38 (-0.08-0.76)	0.62 (-0.13-1.22)	10.36 (-2.16-20.53)	-0.62 (-0.95--0.3)	-0.5 (-0.81--0.19)
Romania	0.05 (-0.01-0.11)	0.17 (-0.03-0.4)	1.25 (-0.22-2.99)	4.46 (-0.77-10.64)	0.01 (0-0.03)	0.02 (0-0.08)	0.17 (-0.02-0.65)	0.49 (-0.05-2.02)	-9.66 (-10.93--8.38)	-10.82 (-12.31--9.31)
Russian Federation	1.67 (-0.36-3.38)	0.92 (-0.2-1.86)	44.79 (-9.61-90.61)	24.19 (-5.19-48.74)	1.51 (-0.3-3.02)	0.63 (-0.13-1.26)	39.58 (-7.95-79.27)	17 (-3.43-34.09)	-0.83 (-1.26--0.4)	-0.7 (-1.16--0.25)
Rwanda	0.17 (-0.03-0.34)	6.02 (-1.22-12.25)	5.02 (-1.04-10.33)	160.33 (-32.97-329.08)	0.18 (-0.03-0.36)	3.05 (-0.57-6.07)	5 (-0.95-10.06)	73.06 (-13.75-146.15)	-3.29 (-3.71--2.86)	-3.75 (-4.2--3.28)
Saint Kitts and Nevis	0 (0-0)	1.15 (-0.27-2.28)	0.01 (0-0.02)	28.31 (-6.61-56.14)	0 (0-0)	0.93 (-0.2-1.87)	0.02 (0-0.03)	22.43 (-4.96-45.73)	-0.16 (-0.43-0.11)	-0.27 (-0.6-0.05)
Saint Lucia	0 (0-0)	1.41 (-0.35-2.69)	0.03 (-0.01-0.06)	34.19 (-8.5-65.63)	0 (0-0.01)	1.07 (-0.24-2.17)	0.07 (-0.01-0.13)	26.5 (-6.08-53.31)	-0.95 (-1.26--0.64)	-0.8 (-1.09--0.52)
Saint Vincent and the Grenadines	0 (0-0)	0.64 (-0.15-1.22)	0.01 (0-0.02)	15.7 (-3.73-29.98)	0 (0-0)	0.62 (-0.14-1.24)	0.02 (-0.01-0.05)	15.67 (-3.52-31.11)	0.03 (-0.28-0.34)	0.1 (-0.2-0.4)
Samoa	0 (0-0)	0.36 (-0.09-0.74)	0.01 (0-0.02)	8.83 (-2.01-18.19)	0 (0-0)	0.31 (-0.08-0.62)	0.01 (0-0.02)	7.62 (-1.83-15.53)	-0.55 (-0.62--0.48)	-0.5 (-0.58--0.41)
San Marino	0 (0-0)	0.3 (-0.07-0.63)	0 (0-0)	7.1 (-1.56-14.95)	0 (0-0)	0.16 (-0.04-0.37)	0 (0-0.01)	3.7 (-0.88-8.91)	-1.09 (-1.47--0.7)	-1.18 (-1.53--0.82)
Sao Tome and Principe	0 (0-0)	0.65 (-0.14-1.24)	0.01 (0-0.02)	16.01 (-3.31-30.97)	0 (0-0)	1.24 (-0.26-2.56)	0.04 (-0.01-0.08)	30.09 (-6.3-62.22)	2.65 (2.46-2.85)	2.53 (2.36-2.7)
Saudi Arabia	0.02 (-0.01-0.05)	0.47 (-0.1-0.98)	0.67 (-0.15-1.45)	10.84 (-2.42-23.05)	0.06 (-0.01-0.14)	0.37 (-0.08-0.79)	1.97 (-0.41-4.41)	8.46 (-1.76-18.4)	-1.03 (-1.15--0.91)	-1.05 (-1.16--0.94)
Senegal	0.02 (-0.01-0.05)	0.8 (-0.17-1.56)	0.67 (-0.14-1.33)	19.9 (-4.19-39.25)	0.09 (-0.02-0.19)	1.27 (-0.27-2.57)	2.52 (-0.54-5.15)	30.78 (-6.61-62.54)	2.19 (1.78-2.61)	2.1 (1.67-2.53)
Serbia	0.06 (-0.01-0.12)	0.52 (-0.11-1.09)	1.56 (-0.32-3.34)	13.09 (-2.71-27.97)	0.07 (-0.01-0.14)	0.42 (-0.09-0.88)	1.63 (-0.34-3.45)	10.7 (-2.24-22.76)	-0.93 (-1.09--0.76)	-0.92 (-1.12--0.72)
Seychelles	0 (0-0)	1.4 (-0.33-2.65)	0.02 (-0.01-0.04)	38.09 (-9.17-72.52)	0 (0-0)	1.15 (-0.25-2.29)	0.04 (-0.01-0.08)	29.9 (-6.48-60.3)	-0.51 (-0.69--0.34)	-0.67 (-0.83--0.51)
Sierra Leone	0.01 (0-0.03)	0.74 (-0.16-1.44)	0.38 (-0.08-0.76)	18.35 (-3.93-36)	0.05 (-0.01-0.1)	1.26 (-0.24-2.62)	1.26 (-0.24-2.59)	31.17 (-5.97-64.59)	2.48 (2.2-2.76)	2.48 (2.19-2.77)
Singapore	0.02 (0-0.04)	0.87 (-0.19-1.74)	0.47 (-0.1-0.93)	20.54 (-4.52-40.84)	0.02 (0-0.05)	0.27 (-0.05-0.56)	0.5 (-0.09-1.04)	5.74 (-1.07-11.92)	-3.86 (-4.18--3.53)	-4.14 (-4.44--3.84)
Slovakia	0.05 (-0.01-0.11)	0.88 (-0.18-1.81)	1.48 (-0.28-3.09)	25.46 (-4.91-53.03)	0.06 (-0.01-0.12)	0.62 (-0.13-1.3)	1.49 (-0.32-3.18)	16.64 (-3.58-35.52)	-1.13 (-1.29--0.98)	-1.38 (-1.57--1.19)
Slovenia	0.02 (0-0.04)	0.74 (-0.16-1.47)	0.5 (-0.11-1)	20.17 (-4.52-40.14)	0.02 (0-0.04)	0.47 (-0.1-0.93)	0.46 (-0.1-0.92)	11.6 (-2.52-23.1)	-1.88 (-2.05--1.71)	-2.16 (-2.34--1.98)
Solomon Islands	0 (0-0)	0.8 (-0.15-1.6)	0.03 (-0.01-0.06)	20.07 (-3.67-40.71)	0 (0-0)	0.7 (-0.15-1.43)	0.07 (-0.02-0.15)	17.65 (-3.88-36.56)	-0.49 (-0.55--0.44)	-0.46 (-0.52--0.4)
Somalia	0.14 (-0.03-0.29)	5.82 (-1.24-12.24)	4.46 (-0.94-9.29)	155.48 (-33.11-326.37)	0.25 (-0.06-0.51)	4.3 (-1.01-8.55)	7.79 (-1.84-15.9)	110.47 (-26.05-222.59)	-1.16 (-1.25--1.06)	-1.33 (-1.44--1.22)
South Africa	0.57 (-0.13-1.11)	2.77 (-0.62-5.38)	17.22 (-3.81-32.84)	75.59 (-16.75-145.57)	1.16 (-0.25-2.24)	2.57 (-0.56-4.97)	32.03 (-7.1-61.54)	64.73 (-14.28-124.42)	-0.78 (-1.29--0.27)	-1.07 (-1.57--0.58)
South Sudan	0.12 (-0.03-0.24)	4.69 (-1.01-9.37)	3.23 (-0.68-6.46)	120.28 (-25.4-240.28)	0.15 (-0.03-0.31)	4.01 (-0.9-8.3)	4.49 (-1-9.37)	101.37 (-22.69-210.64)	-0.79 (-0.99--0.6)	-0.86 (-1.08--0.65)
Spain	0.22 (-0.04-0.51)	0.41 (-0.07-0.96)	4.96 (-0.82-11.87)	9.69 (-1.62-23.41)	0.39 (-0.08-0.84)	0.41 (-0.08-0.86)	8.52 (-1.75-17.94)	9.88 (-2.07-20.78)	0.34 (0-0.67)	0.39 (-0.01-0.78)
Sri Lanka	0.15 (-0.04-0.3)	1.51 (-0.39-2.95)	4.24 (-1.08-8.4)	36.82 (-9.46-72.51)	0.26 (-0.05-0.56)	0.96 (-0.2-2.07)	6.47 (-1.3-14.31)	23.32 (-4.68-51.36)	-1.06 (-1.33--0.8)	-1.16 (-1.44--0.88)
Sudan	0.1 (-0.02-0.22)	1.14 (-0.23-2.42)	2.82 (-0.58-6.09)	28.61 (-5.84-61.06)	0.18 (-0.04-0.39)	0.99 (-0.22-2.11)	4.92 (-1.06-10.73)	23.31 (-5.03-50.62)	-0.51 (-0.57--0.46)	-0.72 (-0.77--0.67)
Suriname	0 (0-0)	0.44 (-0.1-0.91)	0.03 (-0.01-0.06)	11.07 (-2.58-22.59)	0 (0-0.01)	0.39 (-0.09-0.82)	0.07 (-0.02-0.14)	10.22 (-2.4-21.62)	-0.07 (-0.29-0.14)	0 (-0.23-0.23)
Sweden	0.09 (-0.02-0.19)	0.6 (-0.14-1.2)	1.9 (-0.45-3.79)	13.52 (-3.19-26.89)	0.13 (-0.03-0.25)	0.56 (-0.13-1.12)	2.38 (-0.53-4.8)	11.85 (-2.64-23.89)	-0.19 (-0.34--0.04)	-0.31 (-0.48--0.15)
Switzerland	0.1 (-0.02-0.2)	0.95 (-0.21-1.92)	2.27 (-0.51-4.6)	23.61 (-5.37-47.93)	0.11 (-0.03-0.23)	0.6 (-0.14-1.2)	2.27 (-0.53-4.57)	13.57 (-3.13-27.44)	-1.07 (-1.23--0.91)	-1.5 (-1.67--1.32)
Syrian Arab Republic	0.01 (0-0.02)	0.16 (-0.03-0.34)	0.2 (-0.04-0.44)	3.67 (-0.74-7.94)	0.02 (-0.01-0.05)	0.2 (-0.05-0.43)	0.6 (-0.15-1.31)	4.39 (-1.06-9.39)	0.25 (0.04-0.47)	0.02 (-0.22-0.25)
Taiwan (Province of China)	0.3 (-0.07-0.58)	1.9 (-0.42-3.65)	8.45 (-1.91-16.23)	49.63 (-11.16-95.42)	0.44 (-0.08-0.98)	1.05 (-0.19-2.34)	11.9 (-2.11-26.41)	29.69 (-5.23-65.51)	-2.16 (-2.49--1.84)	-1.84 (-2.24--1.44)
Tajikistan	0.05 (-0.01-0.1)	1.81 (-0.38-3.86)	1.17 (-0.26-2.57)	42.18 (-9.07-91.83)	0.04 (-0.01-0.09)	0.79 (-0.12-1.87)	0.9 (-0.13-2.26)	16.1 (-2.36-39.56)	-3.65 (-4.33--2.96)	-4.25 (-4.99--3.51)
Thailand	0.43 (-0.1-0.89)	1.23 (-0.29-2.54)	12.47 (-2.99-25.74)	31.88 (-7.63-65.7)	1.12 (-0.24-2.26)	1.02 (-0.22-2.06)	30.81 (-6.57-62.32)	28.58 (-6.1-57.56)	-0.96 (-1.09--0.83)	-0.67 (-0.8--0.54)
Timor-Leste	0 (0-0)	0.72 (-0.17-1.41)	0.06 (-0.01-0.12)	18.26 (-4.27-36.32)	0 (0-0.01)	0.57 (-0.13-1.2)	0.12 (-0.03-0.26)	14.02 (-3.23-29.32)	-0.72 (-0.93--0.51)	-0.88 (-1.12--0.64)
Togo	0.01 (0-0.02)	0.83 (-0.2-1.62)	0.28 (-0.07-0.53)	20.85 (-4.89-40.31)	0.06 (-0.01-0.13)	1.63 (-0.34-3.4)	1.77 (-0.38-3.8)	40.95 (-8.71-87.52)	2.76 (2.53-3)	2.8 (2.56-3.04)
Tokelau	0 (0-0)	0.6 (-0.14-1.21)	0 (0-0)	14.18 (-3.33-28.92)	0 (0-0)	0.48 (-0.12-0.94)	0 (0-0)	11.3 (-2.69-22.28)	-0.88 (-0.93--0.82)	-0.9 (-0.96--0.84)
Tonga	0 (0-0)	0.56 (-0.12-1.1)	0.01 (0-0.02)	13.08 (-2.83-26.56)	0 (0-0)	0.53 (-0.12-1.1)	0.01 (0-0.02)	12.45 (-2.72-25.57)	-0.25 (-0.45--0.05)	-0.27 (-0.45--0.08)
Trinidad and Tobago	0 (0-0.01)	0.62 (-0.15-1.19)	0.13 (-0.03-0.25)	15.06 (-3.67-28.89)	0.01 (0-0.02)	0.48 (-0.1-0.97)	0.24 (-0.05-0.48)	12.32 (-2.66-25)	-0.88 (-1.12--0.65)	-0.75 (-0.99--0.51)
Tunisia	0.01 (0-0.01)	0.14 (-0.03-0.29)	0.17 (-0.04-0.35)	3.27 (-0.68-6.72)	0.01 (0-0.02)	0.07 (-0.01-0.17)	0.19 (-0.03-0.5)	1.45 (-0.25-3.71)	-2.97 (-3.21--2.73)	-3.47 (-3.76--3.17)
Türkiye	0.01 (0-0.05)	0.05 (-0.01-0.17)	0.3 (-0.03-1.08)	0.93 (-0.1-3.22)	0.01 (0-0.03)	0.01 (0-0.03)	0.1 (-0.01-0.4)	0.12 (-0.01-0.47)	-4.61 (-5.22--3.99)	-5.49 (-6.31--4.68)
Turkmenistan	0.1 (-0.02-0.2)	5.29 (-1.12-11.2)	2.56 (-0.54-5.47)	129.39 (-27.31-275.05)	0.01 (0-0.03)	0.28 (-0.04-0.81)	0.21 (-0.03-0.69)	5.56 (-0.85-17.17)	-10.64 (-11.3--9.97)	-11.39 (-12.14--10.63)
Tuvalu	0 (0-0)	0.72 (-0.16-1.47)	0 (0-0)	18 (-4.05-37.17)	0 (0-0)	0.57 (-0.12-1.14)	0 (0-0)	14.13 (-2.94-28.31)	-0.82 (-0.86--0.78)	-0.83 (-0.89--0.78)
Uganda	0.26 (-0.07-0.5)	4.14 (-1.09-8.03)	7.07 (-1.8-13.77)	103.63 (-26.68-201.46)	0.58 (-0.12-1.18)	4.1 (-0.84-8.25)	16.57 (-3.38-34.34)	101.73 (-20.8-207.81)	-0.45 (-0.67--0.23)	-0.55 (-0.8--0.3)
Ukraine	0.4 (-0.08-0.83)	0.55 (-0.12-1.14)	11.25 (-2.39-23.26)	15.75 (-3.38-32.58)	0.18 (-0.03-0.44)	0.23 (-0.04-0.59)	4.84 (-0.83-12.51)	6.7 (-1.16-17.4)	-4.12 (-4.67--3.58)	-4.2 (-4.78--3.62)
United Arab Emirates	0 (0-0)	0.06 (-0.01-0.17)	0 (0-0.01)	0.86 (-0.12-2.9)	0.01 (0-0.02)	0.45 (-0.09-0.93)	0.37 (-0.07-0.75)	8.79 (-1.78-17.82)	9.35 (7.65-11.07)	9.89 (7.93-11.89)
United Kingdom	1.45 (-0.32-2.86)	1.57 (-0.35-3.11)	30.65 (-6.71-60.74)	35.68 (-7.79-70.82)	2 (-0.43-3.97)	1.46 (-0.32-2.9)	38.39 (-8.31-76.06)	31.21 (-6.79-61.83)	-0.35 (-0.52--0.19)	-0.54 (-0.71--0.36)
United Republic of Tanzania	0.45 (-0.1-0.89)	4.31 (-0.95-8.5)	12.76 (-2.84-24.73)	109.46 (-24.28-211.81)	0.73 (-0.14-1.43)	2.98 (-0.59-5.88)	20.11 (-3.98-40.16)	72.64 (-14.34-144.08)	-1.51 (-1.63--1.38)	-1.67 (-1.8--1.53)
United States of America	2.18 (-0.47-4.37)	0.69 (-0.15-1.39)	52.26 (-11.07-104.92)	17.46 (-3.7-35.09)	3.93 (-0.86-7.92)	0.66 (-0.14-1.34)	86.29 (-18.65-173.2)	15.48 (-3.35-31.13)	-0.08 (-0.25-0.1)	-0.3 (-0.46--0.14)
United States Virgin Islands	0 (0-0)	0.82 (-0.18-1.64)	0.02 (0-0.04)	19.86 (-4.3-40.07)	0 (0-0)	0.53 (-0.12-1.07)	0.02 (-0.01-0.04)	13.28 (-3-26.99)	-1.2 (-1.35--1.05)	-1.05 (-1.2--0.91)
Uruguay	0.08 (-0.02-0.17)	2.16 (-0.52-4.24)	1.91 (-0.46-3.76)	49.7 (-11.86-97.8)	0.07 (-0.02-0.15)	1.28 (-0.28-2.54)	1.5 (-0.33-2.97)	28.62 (-6.23-56.87)	-1.83 (-2.03--1.63)	-1.96 (-2.17--1.76)
Uzbekistan	0.18 (-0.03-0.43)	1.66 (-0.3-3.87)	4.7 (-0.8-11.25)	40.31 (-6.9-95.62)	0.01 (0-0.02)	0.04 (0-0.11)	0.1 (-0.01-0.39)	0.51 (-0.05-1.82)	-15.14 (-16.56--13.69)	-17.36 (-19.07--15.63)
Vanuatu	0 (0-0)	0.66 (-0.12-1.37)	0.01 (0-0.02)	16.38 (-3.02-34.47)	0 (0-0)	0.59 (-0.14-1.17)	0.03 (-0.01-0.06)	14.52 (-3.29-29.12)	-0.47 (-0.52--0.41)	-0.5 (-0.56--0.44)
Venezuela (Bolivarian Republic of)	0.06 (-0.01-0.12)	0.67 (-0.16-1.31)	1.5 (-0.36-2.92)	15.2 (-3.7-29.56)	0.12 (-0.03-0.25)	0.4 (-0.09-0.84)	2.86 (-0.64-5.97)	9.34 (-2.1-19.56)	-1.8 (-1.96--1.63)	-1.76 (-1.91--1.6)
Viet Nam	0.21 (-0.05-0.44)	0.52 (-0.12-1.08)	5.55 (-1.27-11.79)	13.39 (-3.06-28.34)	0.47 (-0.1-1)	0.46 (-0.1-0.98)	13.09 (-2.79-28.36)	12.03 (-2.59-25.86)	-0.36 (-0.48--0.24)	-0.27 (-0.41--0.13)
Yemen	0.06 (-0.01-0.13)	1.29 (-0.25-2.83)	1.72 (-0.33-3.79)	32.27 (-6.23-71.88)	0.13 (-0.03-0.29)	1.01 (-0.2-2.24)	3.65 (-0.75-8.07)	24.04 (-4.9-53.18)	-1.03 (-1.14--0.93)	-1.24 (-1.35--1.13)
Zambia	0.15 (-0.03-0.28)	5.27 (-1.16-10.25)	4.29 (-0.9-8.34)	136.48 (-29.34-264.78)	0.3 (-0.06-0.65)	4.42 (-0.86-9.49)	8.92 (-1.72-19.45)	112.14 (-21.54-245.05)	-1.06 (-1.3--0.83)	-1.17 (-1.42--0.91)
Zimbabwe	0.14 (-0.04-0.28)	3.64 (-0.95-7.11)	3.86 (-1-7.77)	89.6 (-23.26-179.12)	0.31 (-0.07-0.61)	4.57 (-1.03-9.06)	9.12 (-2.06-18.02)	116.68 (-26.31-231.81)	0.89 (0.46-1.33)	1.01 (0.53-1.49)
